# Supplementary material
Source: PubMed Central journal article supplement (PMC2630426)
Supplement: NIHMS86293-supplement-1_si_001.pdf [file NIHMS86293-supplement-1_si_001.pdf]

## Supporting Information

### Novel Opioid Peptide Derived Antagonists Containing (2S)-2-Methyl-3-(2,6-dimethyl-4-carbamoylphenyl)propanoic Acid [(2S)-Mdcp]

*Animesh Ghosh, Jie Luo, Chen Liu, Grazyna Weltrowska, Carole Lemieux,  
Nga N. Chung, Yixin Lu\* and Peter W. Schiller\**

#### Table of Contents

|                                                                                               |    |
|-----------------------------------------------------------------------------------------------|----|
| Description of general methods (chemistry) and in vitro bioassays and receptor binding assays | S2 |
| Purity of compounds <b>1</b> , <b>3</b> and <b>5</b> determined by HPLC                       | S4 |
| HPLC traces of compounds <b>1</b> , <b>3</b> and <b>5</b>                                     | S5 |

---

Corresponding authors:

Phone: +1-514-987-5576. Fax: +1-514-987-5513. E-mail: [schillp@ircm.qc.ca](mailto:schillp@ircm.qc.ca) (P.W.S.)

Phone: +65-6516-1569. Fax: +65-6779-1691. E-mail: [chmlyx@nus.edu.sg](mailto:chmlyx@nus.edu.sg) (Y.L.)

## Experimental Section

**General Methods.** Molecular masses of the compounds were determined by electrospray mass spectrometry on a Hybrid Q-ToF mass spectrometer interfaced to a Mass Lynx 4.0 data system or on a Finnigan/MAT 95XL-T spectrometer.  $^1\text{H}$  and  $^{13}\text{C}$  NMR spectra were recorded on a Varian Unity 400 spectrometer or a Bruker Model *Advance* 300 MHz or DPX-300 NMR spectrometer, and referenced with respect to the residual signals of the solvent. The following abbreviations were used in reporting spectra: s = singlet, d = doublet, t = triplet, q = quartet, m = multiplet. Peptides were purified on a Vydac 218-TP1022 column (22 x 250 mm) with a linear gradient of 20-80% MeOH in 0.1% TFA/H<sub>2</sub>O over 30 min at a flow rate of 12 mL/min (peptides **1** and **3**) or with a linear gradient of 20-65% MeOH in 0.1% TFA/H<sub>2</sub>O over 50 min at a flow rate of 12 mL/min (peptide **5**). Analytical reversed-phase HPLC was performed on a Vydac 218-TP54 column (5 x 250 mm) with a linear gradient of 20-80% acetonitrile in 0.1% TFA/H<sub>2</sub>O at a flow rate of 1 mL/min. The same column was also used for the determination of the capacity factors  $K'$  under the same conditions. Precoated plates (silica gel 60 F<sub>254</sub>, 250  $\mu\text{m}$ , Merck Darmstadt, Germany) were used for ascending TLC in the following solvent systems (all v/v): (I) *n*-BuOH/AcOH/H<sub>2</sub>O (4:1:1), (II) *n*-BuOH/pyridine/AcOH/H<sub>2</sub>O (15:10:3:12), (III) CH<sub>3</sub>Cl/MeOH/CH<sub>3</sub>COOH (85:10:5), (IV) CH<sub>3</sub> COOH/H<sub>2</sub>O (7:13).

**In Vitro Bioassays and Receptor Binding Assays.** The GPI<sup>20</sup> and MVD<sup>21</sup> bioassays were carried out as reported in detail elsewhere.<sup>22,23</sup>  $K_e$  values for antagonists were determined from the ratio of IC<sub>50</sub> values obtained with an agonist in the presence and absence of a fixed antagonist concentration.<sup>24</sup>  $\mu$  antagonist  $K_e$  values of compounds were determined in the GPI assay against the  $\mu$  agonist TAPP<sup>25</sup> using antagonist concentrations ranging from 10 to 1000 nM.  $\kappa$  antagonist  $K_e$  values of compounds were also measured in the GPI assay against the  $\kappa$  agonist U50,488, using antagonist concentrations ranging from 10 to 2000 nM.  $\delta$  antagonist  $K_e$  values of compounds were determined in the MVD assay against the  $\delta$  agonist DPDPE using antagonist concentrations ranging from 2 to 4000 nM.

Opioid receptor binding studies were performed as described in detail elsewhere.<sup>22</sup> Binding affinities for  $\mu$  and  $\delta$  receptors were determined by displacing, respectively, [ $^3\text{H}$ ]DAMGO (Multiple Peptide Systems, San Diego, CA) and [ $^3\text{H}$ ]DSLET (Multiple Peptide Systems) from rat brain membrane binding sites, and  $\kappa$  opioid receptor affinities were measured by displacement of [ $^3\text{H}$ ]U69,593 (Amersham) from guinea pig brain membrane binding sites. Incubations were performed for 2h at 0°C with [ $^3\text{H}$ ]DAMGO, [ $^3\text{H}$ ]DSLET and [ $^3\text{H}$ ]U69,593 at respective concentrations of 0.72, 0.78 and 0.80 nM. IC<sub>50</sub> values were determined from log-dose displacement curves, and  $K_i$  values were calculated from the obtained IC<sub>50</sub> values by means of the equation of Cheng and Prusoff,<sup>26</sup> using values of 1.3, 2.6 and 2.9 nM for the dissociation constants of [ $^3\text{H}$ ]DAMGO, [ $^3\text{H}$ ]DSLET, and [ $^3\text{H}$ ]U69,593, respectively.

## References

- (20) Paton, W. D. M. The Action of Morphine and Related Substances on Contraction and on Acetylcholine Output of Coaxially Stimulated Guinea-Pig Ileum. *Br. J. Pharmacol.* **1957**, *12*, 119-127.

- (21) Henderson, G.; Hughes, J.; Kosterlitz, H. W. A New Example of a Morphine Sensitive Neuroeffector Junction: Adrenergic Transmission in the Mouse Vas Deferens. *Br. J. Pharmacol.* **1972**, *46*, 764-766..
- (22) Schiller, P. W.; Lipton, A.; Horrobin, D. F.; Bodanszky, M. Unsulfated C-Terminal 7-Peptide of Cholecystokinin: a New Ligand of the Opiate Receptor. *Biochem. Biophys. Res. Commun.* **1978**, *85*, 1332-1338.
- (23) DiMaio, J.; Nguyen, T. M.-D.; Lemieux, C.; Schiller, P. W. Synthesis and Pharmacological Characterization in Vitro of Cyclic Enkephalin Analogues: Effect of Conformational Constraints on Opiate Receptor Selectivity. *J. Med. Chem.* **1982**, *25*, 1432-1438.
- (24) Kosterlitz, H. W.; Watt, A. J. Kinetic Parameters of Narcotic Agonists and Antagonists with Particular Reference to N-Allylnoroxymorphone (Naloxone). *Br. J. Pharmacol.* **1968**, *33*, 266-276.
- (25) Schiller, P. W.; Nguyen, T. M.-D.; Chung, N. N.; Lemieux, C. Dermorphin Analogues Carrying an Increased Positive Net Charge in Their "Message" Domain Display Extremely High  $\mu$  Opioid Receptor Selectivity. *J. Med. Chem.* **1989**, *32*, 698-703.
- (26) Cheng, Y.; Prusoff, W. H. Relationship Between the Inhibition Constant ( $K_i$ ) and the Concentration of Inhibitor which Causes 50 Per Cent Inhibition ( $I_{50}$ ) of an Enzymatic Reaction. *Biochem. Pharmacol.* **1973**, *22*, 3099-3108.

### Purity of target compounds 1, 3 and 5

Analytical reversed-phase HPLC was performed on a Varian 9010/9050 system using a Vydac 218-TP54 column (5 x 250 mm) with a linear gradient of 20-80% acetonitrile in 0.1% TFA/H<sub>2</sub>O at a flow rate of 1 mL/min ( $\lambda = 254$  nm).

| Compound                                                                                      | K'   | Purity |
|-----------------------------------------------------------------------------------------------|------|--------|
| <b>1</b> (2 <i>S</i> )-Mdcp-c[D-Cys-Gly-Phe( <i>p</i> NO <sub>2</sub> )-D-Cys]NH <sub>2</sub> | 3.75 | > 98%  |
| <b>3</b> (2 <i>S</i> )-Mdcp-c[D-Pen-Gly-Phe( <i>p</i> F)-Pen]-Phe-OH                          | 5.83 | > 98%  |
| <b>5</b> [(2 <i>S</i> )-Mdcp <sup>1</sup> ]Dyn A(1-11)-NH <sub>2</sub>                        | 3.78 | > 95%  |

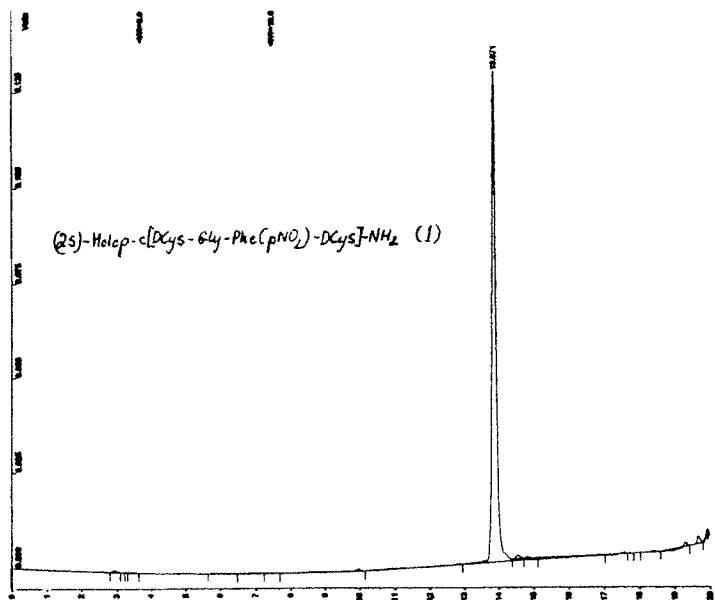

Compound 1

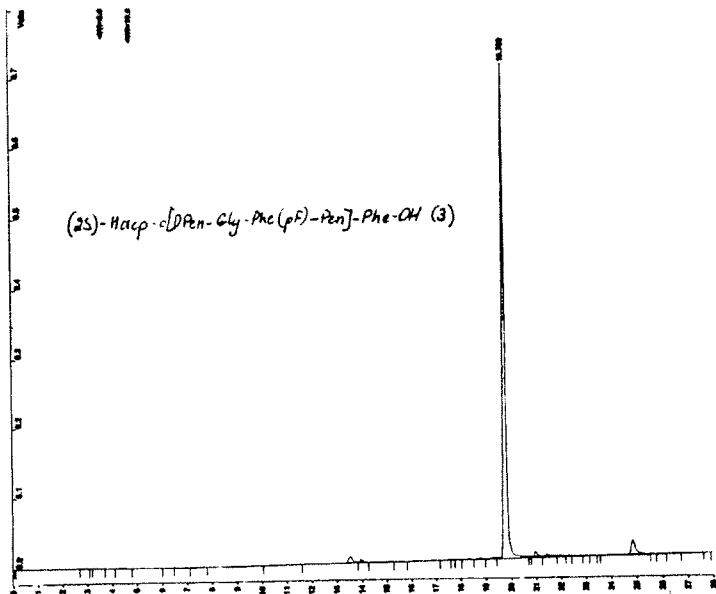

Compound 3

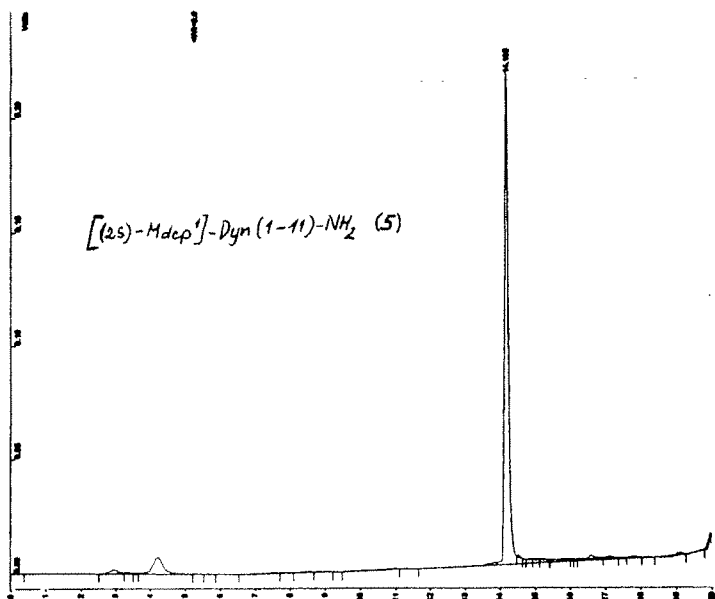

Compound 5
